# Supplementary material for: Manufacture of 3-dimensional objects by reactive inkjet printing
Source: Royal Society of Chemistry journal article supplement (doi:10.1039/b807758d), 2008-01-01
Supplement: b807758d.pdf [file b807758d.pdf]

Supplement 1

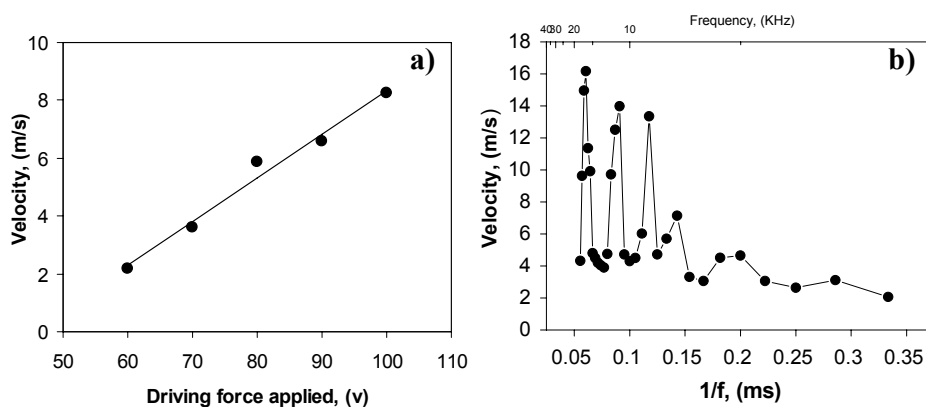

**Influence of printing parameters on printed drop velocity: a) effect of voltage applied to the piezoelectric actuator at 2000 Hz, and b) effect of printing frequency at 60 V.**

Supplement 2

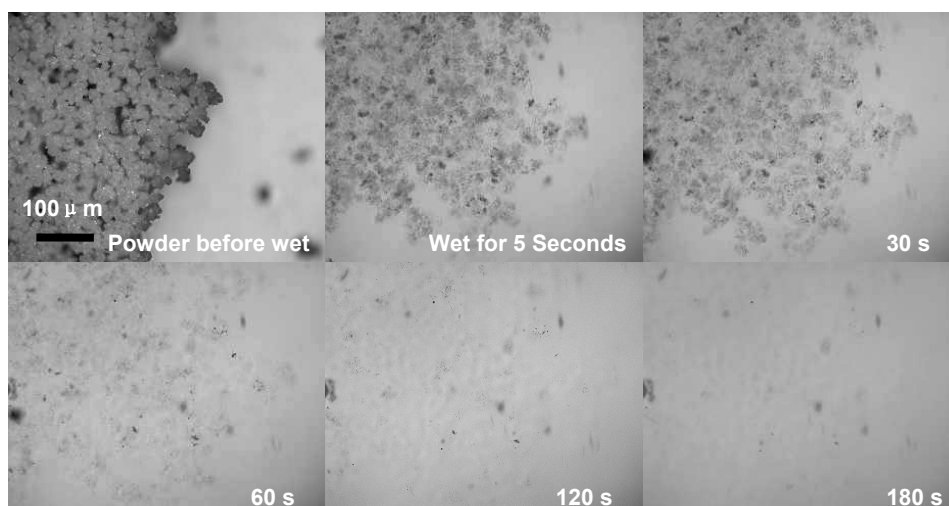

**Optical microscope images, taken after various time intervals, tracking the dissolution of a single liquid drop into a powder bed containing particles of 25 μm mean diameter.**
